# Supplementary material for: Machine learning for prediction of asthma exacerbations among asthmatic patients: a systematic review and meta-analysis
Source: Springer Nature journal article supplement (doi:10.1186/s12890-023-02570-w), 2023-07-28
Supplement: 12890_2023_2570_MOESM1_ESM.pdf [file 12890_2023_2570_MOESM1_ESM.pdf]

Additional file 1. Search term and results

|                                           |     |                                                                                                                                                                                                                                                                                                                                                                                                                                                                                                                                                                                                                                                                                                                                                                                                                                                                                                                                                |
|-------------------------------------------|-----|------------------------------------------------------------------------------------------------------------------------------------------------------------------------------------------------------------------------------------------------------------------------------------------------------------------------------------------------------------------------------------------------------------------------------------------------------------------------------------------------------------------------------------------------------------------------------------------------------------------------------------------------------------------------------------------------------------------------------------------------------------------------------------------------------------------------------------------------------------------------------------------------------------------------------------------------|
| PubMed<br>(-2022/12/15)<br>2103           | #1  | ((Asthma*[Title/Abstract]) OR (Bronchial Asthma[Title/Abstract])) OR (Asthma, Bronchial[Title/Abstract])                                                                                                                                                                                                                                                                                                                                                                                                                                                                                                                                                                                                                                                                                                                                                                                                                                       |
|                                           | #2  | ((Acute*[Title/Abstract]) OR (Emergenc*[Title/Abstract])) OR (Exacerbation*[Title/Abstract]) OR (Attack*[Title/Abstract]) OR (Hospital*[Title/Abstract]) OR (Admission*[Title/Abstract])                                                                                                                                                                                                                                                                                                                                                                                                                                                                                                                                                                                                                                                                                                                                                       |
|                                           | #3  | ((Status Asthmaticus[Title/Abstract]) OR (Asthmaticus, Status[Title/Abstract])) OR (Asthmatic Cris*[Title/Abstract]) OR (Cris*, Asthmatic[Title/Abstract]) OR (Asthmatic Shock*[Title/Abstract]) OR (Shock*, Asthmatic[Title/Abstract])                                                                                                                                                                                                                                                                                                                                                                                                                                                                                                                                                                                                                                                                                                        |
|                                           | #4  | ((Machine learning[Title/Abstract]) OR (Deep learning[Title/Abstract]) OR (Support Vector Machine[Title/Abstract]) OR (SVM[Title/Abstract]) OR (Random forest[Title/Abstract]) OR (Logistic Model*[Title/Abstract]) OR (Logit Model*[Title/Abstract]) OR (Logistic Regression*[Title/Abstract]) OR (Adaboost[Title/Abstract]) OR (XGBoost[Title/Abstract]) OR (Catboost[Title/Abstract]) OR (Decision Trees[Title/Abstract]) OR (Naïve Bayes[Title/Abstract]) OR (Prediction model*[Title/Abstract]) OR (K nearest neighbor[Title/Abstract]) OR (KNN[Title/Abstract]) OR (Neural network*[Title/Abstract]) OR (Perceptron*[Title/Abstract]) OR (ANN[Title/Abstract]) OR (RNN[Title/Abstract]) OR (CNN[Title/Abstract]) OR (Long short-term memory[Title/Abstract]) OR (LSTM[Title/Abstract]) OR (FNN[Title/Abstract]) OR (Artificial intelligence[Title/Abstract]) OR (Natural language processing[Title/Abstract]) OR (NLP [Title/Abstract])) |
|                                           | #5  | #2 OR #3                                                                                                                                                                                                                                                                                                                                                                                                                                                                                                                                                                                                                                                                                                                                                                                                                                                                                                                                       |
|                                           | #6  | #1 AND #4 AND #5                                                                                                                                                                                                                                                                                                                                                                                                                                                                                                                                                                                                                                                                                                                                                                                                                                                                                                                               |
| Cochrane Library<br>(- 2022/12/15)<br>193 | #1  | MeSH descriptor: [Asthma] explode all trees                                                                                                                                                                                                                                                                                                                                                                                                                                                                                                                                                                                                                                                                                                                                                                                                                                                                                                    |
|                                           | #2  | (bronchial asthma): ti, ab, kw OR (Asthma, Bronchial): ti, ab, kw                                                                                                                                                                                                                                                                                                                                                                                                                                                                                                                                                                                                                                                                                                                                                                                                                                                                              |
|                                           | #3  | #1 OR #2                                                                                                                                                                                                                                                                                                                                                                                                                                                                                                                                                                                                                                                                                                                                                                                                                                                                                                                                       |
|                                           | #4  | (Acute*): ti, ab, kw OR (Emergenc*): ti, ab, kw OR (Exacerbation*): ti, ab, kw OR (Attack*): ti, ab, kw OR (Hospital*): ti, ab, kw                                                                                                                                                                                                                                                                                                                                                                                                                                                                                                                                                                                                                                                                                                                                                                                                             |
|                                           | #5  | (Admission*): ti, ab, kw                                                                                                                                                                                                                                                                                                                                                                                                                                                                                                                                                                                                                                                                                                                                                                                                                                                                                                                       |
|                                           | #6  | #4 OR #5                                                                                                                                                                                                                                                                                                                                                                                                                                                                                                                                                                                                                                                                                                                                                                                                                                                                                                                                       |
|                                           | #7  | MeSH descriptor: [Status Asthmaticus] explode all trees                                                                                                                                                                                                                                                                                                                                                                                                                                                                                                                                                                                                                                                                                                                                                                                                                                                                                        |
|                                           | #8  | (Asthmaticus, Status): ti, ab, kw OR (Asthmatic Cris*): ti, ab, kw OR (Cris*, Asthmatic): ti, ab, kw OR (Asthmatic Shock*): ti, ab, kw OR (Shock*, Asthmatic): ti, ab, kw                                                                                                                                                                                                                                                                                                                                                                                                                                                                                                                                                                                                                                                                                                                                                                      |
|                                           | #9  | #7 OR #8                                                                                                                                                                                                                                                                                                                                                                                                                                                                                                                                                                                                                                                                                                                                                                                                                                                                                                                                       |
|                                           | #10 | #6 OR #9                                                                                                                                                                                                                                                                                                                                                                                                                                                                                                                                                                                                                                                                                                                                                                                                                                                                                                                                       |
|                                           | #11 | MeSH descriptor: [Machine learning] explode all trees                                                                                                                                                                                                                                                                                                                                                                                                                                                                                                                                                                                                                                                                                                                                                                                                                                                                                          |
|                                           | #12 | (Deep learning): ti, ab, kw OR (Support Vector Machine): ti, ab, kw                                                                                                                                                                                                                                                                                                                                                                                                                                                                                                                                                                                                                                                                                                                                                                                                                                                                            |

|                                         |     |                                                                                                                                                                                                                                                                                                                                                                                                                                                                                                                                           |
|-----------------------------------------|-----|-------------------------------------------------------------------------------------------------------------------------------------------------------------------------------------------------------------------------------------------------------------------------------------------------------------------------------------------------------------------------------------------------------------------------------------------------------------------------------------------------------------------------------------------|
|                                         |     | OR (SVM): ti, ab, kw OR (Random forest): ti, ab, kw OR (Logistic Model*): ti, ab, kw                                                                                                                                                                                                                                                                                                                                                                                                                                                      |
|                                         | #13 | (Logit Model*): ti, ab, kw OR (Logistic Regression*): ti, ab, kw OR (*boost): ti, ab, kw OR (Decision Trees): ti, ab, kw OR (Naïve Bayes*): ti, ab, kw                                                                                                                                                                                                                                                                                                                                                                                    |
|                                         | #14 | (Prediction model*): ti, ab, kw OR (K nearest neighbor): ti, ab, kw OR (KNN): ti, ab, kw OR (Neural network*): ti, ab, kw OR (Perceptron*): ti, ab, kw                                                                                                                                                                                                                                                                                                                                                                                    |
|                                         | #15 | (ANN): ti, ab, kw OR (RNN): ti, ab, kw OR (CNN): ti, ab, kw OR (Long short-term memory): ti, ab, kw OR (LSTM): ti, ab, kw                                                                                                                                                                                                                                                                                                                                                                                                                 |
|                                         | #16 | (FNN): ti, ab, kw OR (Artificial intelligence): ti, ab, kw OR (Natural language processing): ti, ab, kw OR (NLP): ti, ab, kw                                                                                                                                                                                                                                                                                                                                                                                                              |
|                                         | #17 | #11 OR #12 OR #13 OR #14 OR #15 OR #16                                                                                                                                                                                                                                                                                                                                                                                                                                                                                                    |
|                                         | #18 | #3 AND #10 AND #17                                                                                                                                                                                                                                                                                                                                                                                                                                                                                                                        |
| Web of Science<br>(-2022/12/15)<br>4085 | #1  | TS=(Asthma*) or TS=(Bronchial Asthma) or TS=(Asthma, Bronchial)                                                                                                                                                                                                                                                                                                                                                                                                                                                                           |
|                                         | #2  | TS=(Acute*) or TS=(Emergenc*) or TS=(Exacerbation*) or TS=(Attack*) or TS=(Hospital*) or TS=(Admission*)                                                                                                                                                                                                                                                                                                                                                                                                                                  |
|                                         | #3  | TS=(Status Asthmaticus) or TS=(Asthmaticus, Status) or TS=(Asthmatic Cris*) or TS=(Cris*, Asthmatic) or TS=(Asthmatic Shock*) or TS=(Shock*, Asthmatic)                                                                                                                                                                                                                                                                                                                                                                                   |
|                                         | #4  | #2 OR #3                                                                                                                                                                                                                                                                                                                                                                                                                                                                                                                                  |
|                                         | #5  | TS=(Machine learning) OR TS=(Deep learning) OR TS=(Support Vector Machine) OR TS=(SVM) OR TS=(Random forest) OR TS=(Logistic Model*) OR TS=(Logit Model*) OR TS=(Logistic Regression*) OR TS=(*boost) OR TS=(Decision Trees) OR TS=(Naïve Bayes) OR TS=(Prediction model*) OR TS=(K nearest neighbor) OR TS=(KNN) OR TS=(Neural network*) OR TS=(Perceptron*) OR TS=(ANN) OR TS=(RNN) OR TS=(CNN) OR TS=(Long short-term memory) OR TS=(LSTM) OR TS=(FNN) OR TS=(Artificial intelligence) OR TS=(Natural language processing) OR TS=(NLP) |
|                                         | #6  | #1 AND #4 AND #5                                                                                                                                                                                                                                                                                                                                                                                                                                                                                                                          |
| EMBASE<br>(-2022/12/15)<br>4083         | #1  | 'asthma'/exp                                                                                                                                                                                                                                                                                                                                                                                                                                                                                                                              |
|                                         | #2  | 'bronchial asthma':ti,ab,kw OR 'asthma, bronchial':ti,ab,kw                                                                                                                                                                                                                                                                                                                                                                                                                                                                               |
|                                         | #3  | #1 OR #2                                                                                                                                                                                                                                                                                                                                                                                                                                                                                                                                  |
|                                         | #4  | 'acute*':ti,ab,kw OR 'emergenc*':ti,ab,kw OR 'exacerbation*':ti,ab,kw OR 'attack*':ti,ab,kw OR 'hospital':ti,ab,kw OR 'admission*':ti,ab,kw                                                                                                                                                                                                                                                                                                                                                                                               |
|                                         | #5  | 'status asthmaticus'/exp                                                                                                                                                                                                                                                                                                                                                                                                                                                                                                                  |
|                                         | #6  | 'asthmaticus, status':ti,ab,kw OR 'asthmatic cris*':ti,ab,kw OR 'cris*, asthmatic':ti,ab,kw OR 'asthmatic shock*':ti,ab,kw OR 'shock*, asthmatic':ti,ab,kw                                                                                                                                                                                                                                                                                                                                                                                |
|                                         | #7  | #5 OR #6                                                                                                                                                                                                                                                                                                                                                                                                                                                                                                                                  |

|                        |     |                                                                                                                                                                                                                                                                                                                                                                                                                                                                                                                                                                                                                                                                                          |
|------------------------|-----|------------------------------------------------------------------------------------------------------------------------------------------------------------------------------------------------------------------------------------------------------------------------------------------------------------------------------------------------------------------------------------------------------------------------------------------------------------------------------------------------------------------------------------------------------------------------------------------------------------------------------------------------------------------------------------------|
|                        | #8  | #4 OR #7                                                                                                                                                                                                                                                                                                                                                                                                                                                                                                                                                                                                                                                                                 |
|                        | #9  | 'machine learning'/exp                                                                                                                                                                                                                                                                                                                                                                                                                                                                                                                                                                                                                                                                   |
|                        | #10 | 'deep learning':ti,ab,kw OR 'support vector machine':ti,ab,kw OR svm:ti,ab,kw OR 'random forest':ti,ab,kw OR 'logistic model*':ti,ab,kw OR 'logit model*':ti,ab,kw OR 'logistic regression*':ti,ab,kw OR adaboost:ti,ab,kw OR xgboost:ti,ab,kw OR catboost:ti,ab,kw OR 'decision trees':ti,ab,kw OR 'naïve bayes':ti,ab,kw OR 'prediction model*':ti,ab,kw OR 'k nearest neighbor':ti,ab,kw OR knn:ti,ab,kw OR 'neural network*':ti,ab,kw OR perceptron*':ti,ab,kw OR ann:ti,ab,kw OR rnn:ti,ab,kw OR cnn:ti,ab,kw OR 'long short-term memory':ti,ab,kw OR lstm:ti,ab,kw OR fnn:ti,ab,kw OR 'artificial intelligence':ti,ab,kw OR 'natural language processing':ti,ab,kw OR nlp:ti,ab,kw |
|                        | #11 | #9 OR #10                                                                                                                                                                                                                                                                                                                                                                                                                                                                                                                                                                                                                                                                                |
|                        | #12 | #3 AND #8 AND #11                                                                                                                                                                                                                                                                                                                                                                                                                                                                                                                                                                                                                                                                        |
| Total records<br>10434 |     |                                                                                                                                                                                                                                                                                                                                                                                                                                                                                                                                                                                                                                                                                          |
