# Supplementary material for: Machine learning for prediction of asthma exacerbations among asthmatic patients: a systematic review and meta-analysis
Source: Springer Nature journal article supplement (doi:10.1186/s12890-023-02570-w), 2023-07-28
Supplement: 12890_2023_2570_MOESM2_ESM.pdf [file 12890_2023_2570_MOESM2_ESM.pdf]

## Additional file 2. Methods

### 1. Elements of data extraction

|                            |                                                                                                                                                                       |
|----------------------------|-----------------------------------------------------------------------------------------------------------------------------------------------------------------------|
| Paper source               | The first author's name, publication year                                                                                                                             |
| Study information          | Country, study design (prospective, retrospective), data source, sample size, positive cases, negative cases                                                          |
| Prediction models          | Machine learning algorithms, number of machine learning-based prediction models, validation methods, prediction windows, input features, most important features      |
| Performance measures       | Area under receiving operating curve (AUROC), specificity, sensitivity/recall/true positive rate, positive predictive value/precision, and negative predictive value) |
| Population characteristics | Age, gender, asthma status (if available)                                                                                                                             |
| Predictors                 | Demographic predictors, clinical predictors, social-economic predictors, environment predictors                                                                       |
| Outcomes                   | Definitions                                                                                                                                                           |

### 2. Commands for meta-analysis

```
# Pool performance measure
midas tp fp fn tn, res(all)
# SROC and pooled AUROC
midas tp fp fn tn, plot sroc(both)
#Meta-regeression analysis
metareg lndor variable_list, wsse(SeIldor) bbest(reml)
#Forest plots of sensitivity and specificity
midas tp fp fn tn, id(author) table(dss) texts(0.60) bfor(dss) ford fors ms(0.75)
# Forest plots of positive and negative likelihood ratio
midas tp fp fn tn, id(author) table(dlr) texts(0.70) ford fors bfor(dss)
# Forest plots of diagnostic odds ratio
midas tp fp fn tn, id(author) table(dlor) ford fors bfor(dss) texts(0.70)
# Publication bias test
midas tp fp fn tn, pubbias
```
