# Supplementary material for: Machine learning for prediction of asthma exacerbations among asthmatic patients: a systematic review and meta-analysis
Source: Springer Nature journal article supplement (doi:10.1186/s12890-023-02570-w), 2023-07-28
Supplement: 12890_2023_2570_MOESM3_ESM.pdf [file 12890_2023_2570_MOESM3_ESM.pdf]

Additional file 3. Definitions of participants and outcomes of included studies

| Studies (author, year) | Participants                                                                                                                                                                                                                                                                                                                  | Outcome                                                                                                                                                                                                                                                                     |
|------------------------|-------------------------------------------------------------------------------------------------------------------------------------------------------------------------------------------------------------------------------------------------------------------------------------------------------------------------------|-----------------------------------------------------------------------------------------------------------------------------------------------------------------------------------------------------------------------------------------------------------------------------|
| Lieu, 1999             | <p><b>Asthma</b></p> <ol style="list-style-type: none"> <li>1. A hospitalization, ED visit, or outpatient clinic visit with an ICD-9 code of 493.XX</li> <li>2. Adult aged 18-44 years who used asthma medications</li> <li>3. Exclude adults aged 45 and older unless they had an ICD-9-coded diagnosis of asthma</li> </ol> | <p><b>Asthma-related hospitalization or ED visit:</b> a principal diagnosis of 493.XX; 2. Any diagnosis of 493.XX + a principal diagnosis of an asthma-related respiratory condition; Asthma-related ED visit: a diagnosis of asthma or a related respiratory condition</p> |
| Schatz, 2004           | <p><b>Asthma</b></p> <ol style="list-style-type: none"> <li>1. An ICD-9 code of 493.XX</li> <li>2. <math>\geq 2</math> asthma-related medication dispensing in 1 year</li> <li>3. Any ED or regular clinic asthma-related visit in the diagnosis and procedures database</li> <li>4. 5-56 years old</li> </ol>                | <p><b>Asthma hospitalization (primary diagnosis of asthma, ICD code of 493.xx) or ED visit for asthma.</b></p>                                                                                                                                                              |
| Schatz, 2006           | <p><b>Asthma</b></p> <ol style="list-style-type: none"> <li>1. A hospital discharge principal diagnosis of asthma (ICD-9code 493.xx).</li> <li>2. An ED visit with asthma as the principal diagnosis (ICD-9code 493.xx).</li> <li>3. Four or more asthma-related medication dispensing</li> </ol>                             | <p><b>Emergency hospital utilization</b> for asthma: at least 1 hospitalization or ED visit for asthma (ICD-9 code of 493.xx).</p>                                                                                                                                          |
| Xu, 2011               | <p><b>Asthma (mild-moderate):</b></p> <ol style="list-style-type: none"> <li>1. Asthma symptoms and/or medication use for <math>\geq 6</math> months in the previous year</li> <li>2. Airway responsiveness with a provocative concentration</li> </ol>                                                                       | <p><b>Severe asthma exacerbation:</b> an emergency room visit or a hospitalization for asthma symptoms (questionnaire during screening visits).</p>                                                                                                                         |

|                 |                                                                                                                                                                                                                                              |                                                                                                                                                                        |
|-----------------|----------------------------------------------------------------------------------------------------------------------------------------------------------------------------------------------------------------------------------------------|------------------------------------------------------------------------------------------------------------------------------------------------------------------------|
|                 | dose (PC20) of methacholine $\leq$ 12.5mg/ml.                                                                                                                                                                                                |                                                                                                                                                                        |
| van Vliet, 2017 | <b>Asthma:</b><br>1. 6-18yr<br>2. Diagnosed based on GINA and the guidelines of the Dutch Society of Pediatrics                                                                                                                              | <b>Moderate to severe asthma exacerbation:</b> based on the criteria of the ATS/ERS recommendation.                                                                    |
| Luo, 2020       | <b>Asthma:</b><br>Patient had one or more diagnosis codes of asthma (ICD-10 code of J45.x; ICD-9 code of 493.0x, 493.1x, 493.8x,493.9x).                                                                                                     | <b>An asthma-related hospital encounter:</b> ED visit or hospitalization with asthma as the principal diagnosis (ICD-10: J45.x; ICD-9: 493.0x,493.1x, 493.8x, 493.9x). |
| Luo, 2020       | <b>Asthma:</b><br>Patient had one or more diagnosis codes of asthma (ICD-10 code of J45.x; ICD-9 code of 493.0x, 493.1x, 493.8x,493.9x).                                                                                                     | <b>An asthma-related hospital encounter:</b> ED visit or hospitalization with asthma as the principal diagnosis (ICD-10: J45.x; ICD-9: 493.0x,493.1x, 493.8x, 493.9x). |
| Tong, 2021      | <b>Asthma</b><br>1. $\geq$ 18yr<br>2. $\geq$ 1 asthma diagnosis code (ICD-9 code of 493.0x, 493.1x, 493.8x, 493.9x; ICD-10 code of J45.x)                                                                                                    | <b>Asthma hospital encounter:</b> a hospitalization or an ED visit that has asthma as its principal diagnosis (ICD-9: 493.0x, 493.1x, 493.8x, 493.9x; ICD-10: J45.x)   |
| Zein, 2021      | <b>Asthma:</b><br>1.18-80 yr<br>2. ICD9 codes of 493.xx or TenthRevision of J45.xx                                                                                                                                                           | <b>Nonsevere asthma exacerbation:</b> oral glucocorticoid burst<br><b>Severe asthma exacerbations:</b> Requiring an ED visit or hospitalization for asthma             |
| Noble, 2021     | <b>Asthma:</b><br>1. 12-80 yr<br>2. Physician-diagnosed and recorded asthma                                                                                                                                                                  | $\geq$ 1 hospitalization(s) within 12 months                                                                                                                           |
| Hond, 2022      | <b>Asthma (stable mild-moderate):</b><br>1.12-75 yr<br>2. Stable asthma: exclude patients with $\geq$ 4 courses of oral prednisone in the previous 12 months, admission to the hospital because of asthma in the previous 6 months or to the | <b>Severe asthma exacerbations:</b> the need for a course of oral corticosteroids (prednisone) for a minimum of 3 days, as documented in medical records               |

|  |                                                               |  |
|--|---------------------------------------------------------------|--|
|  | intensive care unit because of asthma at any time in the past |  |
|--|---------------------------------------------------------------|--|

ATS/ERS: American Thoracic Society and European Respiratory Society

ICD: International Classification of Diseases

GINA: Global Initiative for Asthma
