# Supplementary material for: Machine learning for prediction of asthma exacerbations among asthmatic patients: a systematic review and meta-analysis
Source: Springer Nature journal article supplement (doi:10.1186/s12890-023-02570-w), 2023-07-28
Supplement: 12890_2023_2570_MOESM5_ESM.pdf [file 12890_2023_2570_MOESM5_ESM.pdf]

### Additional file 5. Features and most important features in prediction models

| Studies<br>(author, year) | Features used in final model |          |                     |                                                  | Top 10 important features                                                                                                                                                                          |
|---------------------------|------------------------------|----------|---------------------|--------------------------------------------------|----------------------------------------------------------------------------------------------------------------------------------------------------------------------------------------------------|
|                           | Demographic                  | Clinical | Social-<br>economic | Other factors                                    |                                                                                                                                                                                                    |
| Lieu, 1999                | √                            | √        |                     |                                                  | Oral steroid prescription (past 12m); ED visit (past 6m); Asthma medication prescription (past 6m); anti-inflammatory/beta2-agonist (past 6m)                                                      |
| Schatz, 2004              |                              | √        |                     |                                                  | ED visit or hospitalization; any oral corticosteroids; >14 beta agonist canisters                                                                                                                  |
| Schatz, 2006              |                              | √        |                     |                                                  | Medication intensity Scale (include two elements: beta agonist canisters and oral corticosteroid)                                                                                                  |
| Xu, 2011                  | √                            | √        |                     |                                                  | SNPs                                                                                                                                                                                               |
| van Vliet, 2017           |                              | √        |                     |                                                  | 7 volatile organic compounds                                                                                                                                                                       |
| Luo, 2020                 | √                            | √        | √                   | Facility feature; primary care provider features | Asthma visit number; systemic steroid ordered; the number of days since the last ED visit; age; the last visit's admission type; asthma duration; ED visit number; SABA ordered                    |
| Luo, 2020                 | √                            | √        | √                   | Primary care provider features                   | Nebulizer medications filled; asthma reliever orders; days since last asthma exacerbation or status asthmaticus diagnosis; ED visit for asthma; ED visits; age; primary/principal asthma diagnoses |
| Tong, 2021                | √                            | √        | √                   | Primary care provider feature                    | Asthma related ED visit number; length of stay of an ED visit; days since the most recent ED visit; primary/principal asthma diagnoses; days since last asthma exacerbation or status              |

|             |   |   |  |  |                                                                                                                                                                                                                                                                                                                                                            |
|-------------|---|---|--|--|------------------------------------------------------------------------------------------------------------------------------------------------------------------------------------------------------------------------------------------------------------------------------------------------------------------------------------------------------------|
|             |   |   |  |  | asthmaticus diagnosis; race; ED visit number; asthma diagnosis number; asthma duration; nebulizer medication orders                                                                                                                                                                                                                                        |
| Zein, 2021  | √ | √ |  |  | Non-severe: ICS+LABA; sinusitis; LTRA; nasal steroids; BMI; eosinophil; albumin; age; IgE; gastroesophageal reflux disease<br>ED: oral steroid burst; age; race; ICS+LABA; albumin; eosinophil; BMI; creatinine; Hispanic; smoking status<br>HP: oral steroid burst; creatinine; ICS+LABA; haemoglobin; BMI; LTRA; eosinophil; race; hypertension; albumin |
| Noble, 2021 | √ | √ |  |  | BMI; smoking status; blood eosinophil counts; diabetes diagnosis/therapy; ischemic heart disease diagnosis; anaphylaxis history; GINA management step; consultation for LRTIs; acute oral steroids; hospitalization number                                                                                                                                 |
| Hond, 2022  |   | √ |  |  | PEF; nocturnal awakening; beta2 reliever                                                                                                                                                                                                                                                                                                                   |

Demographic factors: age, sex, and race.

Clinical factors: medical history, symptoms, comorbidities, signs, auxiliary examination, medicine, visit types/status, et al.

Social economic factors: insurance, income, population information, residence, et al

ICS: Inhaled corticosteroid; LABA: Long-acting  $\beta$ 2-agonists; LTRA: Leukotriene-receptor antagonists; SAAC: Short-acting anticholinergics; SABA: Short-acting  $\beta$ 2-agonists; LRTI: Lower respiratory tract infection; PEF: peak expiratory flow.
