# Supplementary material for: Machine learning for prediction of asthma exacerbations among asthmatic patients: a systematic review and meta-analysis
Source: Springer Nature journal article supplement (doi:10.1186/s12890-023-02570-w), 2023-07-28
Supplement: 12890_2023_2570_MOESM6_ESM.pdf [file 12890_2023_2570_MOESM6_ESM.pdf]

Additional file 6. Risk of bias and applicability assessment based on PROBAST tools.

| Studies         | Risk of bias |            |         |          | Applicability |            |         | Overall |               |
|-----------------|--------------|------------|---------|----------|---------------|------------|---------|---------|---------------|
|                 | Participants | Predictors | Outcome | Analysis | Participants  | Predictors | Outcome | ROB     | Applicability |
| Lieu, 1999      | High         | Low        | High    | High     | Low           | Low        | High    | High    | High          |
| Schatz, 2004    | High         | Low        | Low     | High     | Low           | Low        | High    | High    | High          |
| Schatz, 2006    | High         | Low        | Low     | High     | Low           | Low        | High    | High    | High          |
| Xu, 2011        | Low          | Low        | High    | High     | Low           | High       | High    | High    | High          |
| van Vliet, 2017 | Low          | Low        | Low     | High     | Low           | Low        | Low     | High    | Low           |
| Luo, 2020       | High         | High       | Low     | High     | Low           | High       | High    | High    | High          |
| Luo, 2020       | High         | High       | Low     | High     | Low           | High       | High    | High    | High          |
| Tong, 2021      | High         | High       | Low     | High     | Low           | High       | High    | High    | High          |
| Zein, 2021      | High         | High       | High    | High     | Low           | High       | High    | High    | High          |
| Noble, 2021     | High         | High       | High    | High     | Low           | High       | High    | High    | High          |
| Hond, 2022      | Low          | Low        | Low     | High     | Low           | Low        | High    | High    | High          |
