# Supplementary material for: Machine learning for prediction of asthma exacerbations among asthmatic patients: a systematic review and meta-analysis
Source: Springer Nature journal article supplement (doi:10.1186/s12890-023-02570-w), 2023-07-28

Additional file 8. The overall pooled positive likelihood ratio, negative likelihood ratio, and diagnostic odds ratio of 23 machine learning prediction models

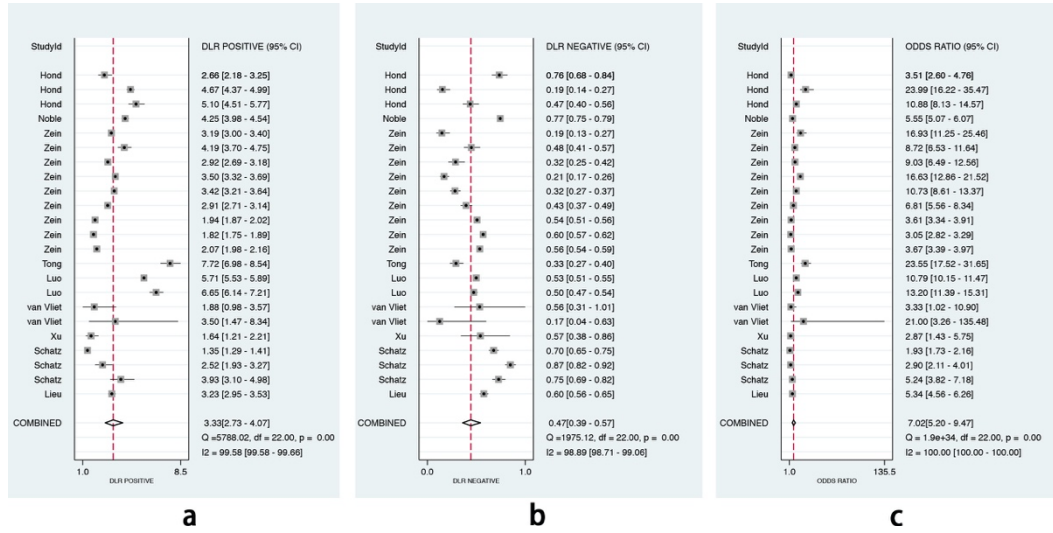

Supplement: 12890_2023_2570_MOESM8_ESM.pdf [file 12890_2023_2570_MOESM8_ESM.pdf]
