# Supplementary material for: Machine learning for prediction of asthma exacerbations among asthmatic patients: a systematic review and meta-analysis
Source: Springer Nature journal article supplement (doi:10.1186/s12890-023-02570-w), 2023-07-28
Supplement: 12890_2023_2570_MOESM10_ESM.pdf [file 12890_2023_2570_MOESM10_ESM.pdf]

Additional file 10. The influence of each model for the outcome of meta-analysis

| Study          | Pooled AUROC (95% CI) | Pooled sensitivity (95% CI) | Pooled specificity (95% CI) | Pooled PLR (95% CI) | Pooled NLR (95% CI) | Pooled DOR (95% CI) |
|----------------|-----------------------|-----------------------------|-----------------------------|---------------------|---------------------|---------------------|
| Lieu 1999      | 0.80(0.76-0.83)       | 0.63(0.55-0.70)             | 0.81(0.75-0.85)             | 3.3(2.7-4.1)        | 0.45(0.37-0.55)     | 7(5-10)             |
| Schatz 2004    | 0.79(0.76-0.83)       | 0.65(0.57-0.71)             | 0.80(0.75-0.85)             | 3.3(2.6-4.0)        | 0.44(0.37-0.53)     | 7(5-10)             |
| Schatz 2006    | 0.81(0.77-0.84)       | 0.63(0.55-0.71)             | 0.82(0.77-0.86)             | 3.5(2.9-4.2)        | 0.45(0.37-0.55)     | 8(6-10)             |
| Xu 2011        | 0.80(0.77-0.83)       | 0.63(0.54-0.70)             | 0.82(0.77-0.86)             | 3.4(2.8-4.2)        | 0.46(0.38-0.55)     | 7(5-10)             |
| Van Vliet 2017 | 0.79(0.75-0.82)       | 0.62(0.54-0.69)             | 0.81(0.76-0.85)             | 3.3(2.7-4.1)        | 0.47(0.39-0.56)     | 7(5-10)             |
| Van Vliet 2017 | 0.80(0.76-0.83)       | 0.63(0.55-0.70)             | 0.81(0.76-0.86)             | 3.4(2.7-4.1)        | 0.46(0.38-0.55)     | 7(5-10)             |
| Luo 2020       | 0.79(0.76-0.83)       | 0.63(0.55-0.71)             | 0.80(0.75-0.85)             | 3.3(2.6-3.9)        | 0.46(0.38-0.55)     | 7(5-10)             |
| Luo 2020       | 0.79(0.76-0.83)       | 0.63(0.55-0.71)             | 0.80(0.75-0.85)             | 3.3(2.6-4.0)        | 0.46(0.37-0.55)     | 7(5-10)             |
| Tong 2021      | 0.79(0.75-0.82)       | 0.62(0.54-0.70)             | 0.80(0.75-0.85)             | 3.3(2.6-3.9)        | 0.47(0.39-0.56)     | 7(5-9)              |
| Zein 2021      | 0.80(0.76-0.83)       | 0.63(0.55-0.71)             | 0.81(0.76-0.86)             | 3.4(2.7-4.2)        | 0.45(0.37-0.55)     | 7(5-10)             |
| Zein 2021      | 0.80(0.76-0.83)       | 0.63(0.55-0.71)             | 0.82(0.76-0.86)             | 3.4(2.8-4.2)        | 0.45(0.37-0.55)     | 8(6-10)             |
| Zein 2021      | 0.80(0.76-0.83)       | 0.63(0.55-0.70)             | 0.82(0.76-0.86)             | 3.4(2.8-4.2)        | 0.46(0.38-0.55)     | 7(5-10)             |
| Zein 2021      | 0.80(0.76-0.83)       | 0.63(0.54-0.70)             | 0.81(0.76-0.85)             | 3.3(2.7-4.1)        | 0.46(0.38-0.56)     | 7(5-10)             |
| Zein 2021      | 0.79(0.75-0.83)       | 0.62(0.54-0.70)             | 0.81(0.76-0.85)             | 3.3(2.6-4.1)        | 0.47(0.39-0.56)     | 7(5-10)             |
| Zein 2021      | 0.79(0.75-0.82)       | 0.61(0.54-0.69)             | 0.81(0.76-0.85)             | 3.3(2.6-4.0)        | 0.47(0.40-0.57)     | 7(5-9)              |
| Zein 2021      | 0.79(0.76-0.83)       | 0.62(0.54-0.70)             | 0.81(0.76-0.86)             | 3.3(2.7-4.1)        | 0.47(0.39-0.56)     | 7(5-10)             |
| Zein 2021      | 0.79(0.76-0.83)       | 0.63(0.55-0.71)             | 0.81(0.75-0.85)             | 3.3(2.6-4.0)        | 0.46(0.38-0.55)     | 7(5-10)             |
| Zein 2021      | 0.79(0.75-0.82)       | 0.61(0.54-0.69)             | 0.81(0.76-0.86)             | 3.3(2.6-4.1)        | 0.48(0.40-0.57)     | 7(5-9)              |
| Noble 2021     | 0.80(0.76-0.83)       | 0.64(0.57-0.71)             | 0.80(0.75-0.84)             | 3.2(2.6-4.0)        | 0.44(0.37-0.53)     | 7(5-10)             |
| Hond 2022      | 0.79(0.76-0.83)       | 0.63(0.55-0.71)             | 0.80(0.75-0.85)             | 3.3(2.6-4.0)        | 0.46(0.38-0.56)     | 7(5-10)             |
| Hond 2022      | 0.79(0.75-0.82)       | 0.62(0.54-0.69)             | 0.81(0.76-0.85)             | 3.2(2.6-4.0)        | 0.48(0.40-0.56)     | 7(5-9)              |
| Hond 2022      | 0.80(0.76-0.83)       | 0.64(0.56-0.71)             | 0.81(0.75-0.85)             | 3.3(2.7-4.1)        | 0.44(0.37-0.53)     | 7(5-10)             |
